# Supplementary material
Source: HighWire-hosted journal article supplement (https://www.rcpjournals.org/highwire/filestream/9358/field_highwire_adjunct_files/2/Chan_Supplemental_file_S3_pro_forma.pdf)
Supplement: Chan_Supplemental_file_S3_pro_forma.pdf [file Chan_Supplemental_file_S3_pro_forma.pdf]

---

**Supplemental material S3 – Post-implementation review pro forma**

**Switch from Originator Etanercept (Enbrel) to biosimilar (Benepali)**

Patient ID

DOB

Sex

Diagnosis      RA

                    PsA

                    SpA

Duration of biologic therapy

Date of switch

1. Did you receive written information about the switch?    Yes      No
2. Did you have the opportunity to discuss the switch with your doctor or nurse at clinic?    Y N
3. Did you have any concerns about switching?      Yes      No
4. If YES to Qs. 3- what were the concerns?
  - a. Safety
  - b. Effectiveness
  - c. Other (please specify)
5. How confident did you feel about the biosimilar?  
0= not confident at all  
10=very confident
6. Did you have any problems with the switch in medication?      Yes      No
7. If YES to Qs. 6:
  - a. Delivery of medication
  - b. Side effects of medication
  - c. Effectiveness of medication
  - d. Other (please specify)
